# Supplementary material
Source: Frontiers journal article supplement (https://www.frontiersin.org/articles/479033)
Supplement: Table_1.XLS [file Table_1.XLS]

## Sheet: Supplementary Table 1
Supplementary Table 1. The information of 18 datasets collected from GEO.
GEO study accession	GEO platform accession	Platform	Sample	Description
GSE11938	GPL4091	Agilent 244K	5	Chromosomal aberration of ESCC and HSCC cell lines
GSE20306	GPL3720	Affymetrix 250K	21	A genome-wide screen for microdeletions reveals disruption of polarity complex genes in diverse human cancers
GSE20939	GPL3718,GPL3720	Affymetrix 250K	19	Genetic and Epigenetic Somatic Alterations in Head and Neck Squamous Cell Carcinomas Are Globally Coordinated but Not Locally Targeted (Affymetrix Copy Number)
GSE23831	GPL4093,GPL10722	Agilent 105K	60	Array CGH analysis of Oral Squamous Cell Carcinoma
GSE25103	GPL6801	Affymetrix SNP6	112	Affymetrix SNP array data for oral squamous cell carcinoma
GSE31984	GPL3720	Affymetrix 250K	60	Genome-wide copy number analysis for occult lymph node metastasis in oral squamous cell carcinoma
GSE33229	GPL6801	Affymetrix SNP6	44	Cancer Outlier Gene Profile Sets Elucidate Pathways and Patient-Specific Targets in Head and Neck Squamous Cell Carcinoma [Affymetrix SNP6]
GSE33983	GPL8736	Agilent 1M	31	Array comparative genomic hybridization in oral cavity (head and neck) squamous cell carcinoma
GSE34507	GPL3720	Affymetrix 250K	28	Affymetrix SNP array data for oral squamous cell carcinoma samples
GSE36790	GPL6801	Affymetrix SNP6	10	Cetuximab resistant or sensitive head and neck cancer samples
GSE39367	GPL6801	Affymetrix SNP6	99	Molecular Subtypes in Head and Neck Cancer [copy number]
GSE40777	GPL8687	Agilent 180K	1	High risk HPV-positive lung carcinomas: molecular evidence for a pattern of pulmonary metastasis
GSE47443	GPL10150	Agilent 180K	225	Somatic copy number alterations associating with alcohol drinking and smoking in head and neck squamous cell carcinoma
GSE51265	GPL3718	Affymetrix 250K	8	Affymetrix SNP array data for oral squamous cell carcinoma and oral dysplasia samples
GSE57201	GPL16694,GPL18628	Agilent 180K, Agilent 105K	12	Human sinonasal squamous cell carcinoma: Cell lines and corresponding primary tumors
GSE66136	GPL9075,GPL10150	Agilent 105K, Agilent 180K	25	Genomic DNA damage in oral potentially malignant disorders (OPMDs) and oral squamous cell carcinomas (OSCCs). Early detection of DNA aneuploidy and chromosomal aberrations in non dysplastic OPMDs.
GSE68717	GPL6801	Affymetrix SNP6	75	Genome-wide LOH and DNA copy number alteration in HPV-neg OSCC and their associations with disease-specific survival
GSE85514	GPL22311	Agilent 105K	38	Array CGH analysis of Oral Leukoplakia and Early Stage Oral Squamous Cell Carcinoma
